# Supplementary material for: Domain and intensity of physical activity are associated with metabolic syndrome: A population-based study
Source: PubMed Central journal article supplement (PMC6636743; doi:10.1371/journal.pone.0219798), 2019-07-17
Supplement: pone.0219798.s001.pdf [file pone.0219798.s001.pdf]

Appendix A. Physical activities recorded and its distribution by domains and intensities

| No.                                 |                                      | n           | % respon.   | No.                                |                                 | n             | % respon.    |
|-------------------------------------|--------------------------------------|-------------|-------------|------------------------------------|---------------------------------|---------------|--------------|
| <b>Leisure</b>                      |                                      | <b>7554</b> | <b>40.9</b> | <b>Leisure (continuation)</b>      |                                 |               |              |
| <b>Light-intensity (&lt;3. MET)</b> |                                      | 3146        | 17.1        | <b>Vigorous (continuation)</b>     |                                 |               |              |
| 3                                   | Walking slow (2-3 km/h)              | 2903        | 15.7        | 28                                 | Hiking (with back pad)          | 71            | 0.4          |
| 15                                  | Fishing (standing or sitting)        | 226         | 1.2         | 34                                 | Tennis, singles                 | 47            | 0.3          |
| 52                                  | Petanque                             | 9           | 0.1         | 35                                 | Martial arts                    | 39            | 0.2          |
| 55                                  | Pistol shooting                      | 8           | 0.0         | 37                                 | Basketball (competition)        | 35            | 0.2          |
| <b>Moderate (≥3 - ≤ 6MET)</b>       |                                      | <b>3490</b> | <b>18.9</b> | 39                                 | Running (12-16 km/h)            | 25            | 0.1          |
| 4                                   | Swimming, sea (>150 m)               | 759         | 4.1         | 41                                 | Squash                          | 22            | 0.1          |
| 6                                   | Walking moderate and brisk (>3 km/h) | 620         | 3.4         | 44                                 | Climbing                        | 17            | 0.1          |
| 9                                   | Exercise (gym)                       | 483         | 2.6         | 58                                 | Handball                        | 7             | 0.04         |
| 11                                  | Swimming, pool (>150 m)              | 305         | 1.7         | 61                                 | Rowing (competition)            | 4             | 0.02         |
| 12                                  | Exercise at home                     | 287         | 1.6         | 66                                 | Skiing                          | 3             | 0.02         |
| 16                                  | Playing with children                | 225         | 1.2         | 69                                 | Badminton                       | 2             | 0.01         |
| 17                                  | Dancing (salon or nightclub)         | 215         | 1.2         | 70                                 | Basketball (referee)            | 2             | 0.01         |
| 22                                  | Hunting, small animals               | 111         | 0.6         | <b>Domestic</b>                    |                                 | <b>5663</b>   | <b>30.6</b>  |
| 23                                  | Walking, cross-country               | 101         | 0.5         | <b>Light-intensity (&lt;3 MET)</b> |                                 | <b>4488</b>   | <b>24.3</b>  |
| 24                                  | Aerobic                              | 98          | 0.5         | 2                                  | Cleaning (house)                | 3547          | 19.2         |
| 31                                  | Lifting weights                      | 67          | 0.4         | 8                                  | Cleaning (garden)               | 598           | 3.2          |
| 32                                  | Diving                               | 57          | 0.3         | 21                                 | Caring, animals                 | 130           | 0.7          |
| 40                                  | Surfing                              | 23          | 0.12        | 26                                 | Carpentry, indoor               | 91            | 0.5          |
| 42                                  | Basketball recreational              | 20          | 0.11        | 30                                 | Painting, indoor                | 68            | 0.4          |
| 43                                  | Riding                               | 19          | 0.10        | 36                                 | Caring, people                  | 37            | 0.2          |
| 47                                  | Table Tennis                         | 13          | 0.07        | 56                                 | Fishing, shellfish              | 8             | 0.04         |
| 48                                  | Tennis, doubles                      | 12          | 0.06        | 59                                 | Cutting the grass (machine)     | 5             | 0.03         |
| 49                                  | Sailing (recreational)               | 10          | 0.05        | 63                                 | Miscellaneous                   | 4             | 0.02         |
| 50                                  | Fishing, river                       | 10          | 0.05        | <b>Moderate (≥3 - ≤ 6 MET)</b>     |                                 | <b>1175</b>   | <b>6.4</b>   |
| 51                                  | Golf (shoulder bag)                  | 9           | 0.05        | 7                                  | Digging the garden              | 601           | 3.3          |
| 53                                  | Motorcycling                         | 9           | 0.05        | 13                                 | Maintaining and caring, farm    | 283           | 1.5          |
| 54                                  | Roller skating                       | 8           | 0.04        | 19                                 | Moving furniture                | 166           | 0.9          |
| 57                                  | Volleyball                           | 7           | 0.04        | 33                                 | Carpentry, outdoor              | 53            | 0.3          |
| 62                                  | Scuba diving                         | 4           | 0.02        | 38                                 | Painting, outdoors              | 33            | 0.2          |
| 64                                  | Rowing, recreational                 | 3           | 0.02        | 45                                 | Masonry, mechanical             | 16            | 0.1          |
| 65                                  | Skiing                               | 3           | 0.02        | 46                                 | Milking                         | 15            | 0.1          |
| 67                                  | Golf (pulling/pushing cart)          | 3           | 0.02        | 60                                 | Grass/hedge cutting, manual     | 5             | 0.03         |
| 71                                  | Archery                              | 2           | 0.01        | 75                                 | Wood loading                    | 1             | 0.01         |
| 68                                  | Canoe trip                           | 2           | 0.01        | 77                                 | Working with hives              | 1             | 0.01         |
| 72                                  | Playing the drums                    | 2           | 0.01        | 78                                 | Shoveling                       | 1             | 0.01         |
| 74                                  | Bowling                              | 1           | 0.01        | <b>Active transport</b>            |                                 | <b>5262</b>   | <b>28.48</b> |
| 73                                  | Water skiing                         | 1           | 0.01        | 1                                  | Climbing stairs (>5 floors/day) | 4096          | 22.2         |
| 76                                  | Hunting, large animals               | 1           | 0.01        | 5                                  | Walking (with shopping bags)    | 622           | 3.4          |
| <b>Vigorous (&gt;6 MET)</b>         |                                      | <b>918</b>  | <b>5.0</b>  | 10                                 | Walking (home-work)             | 331           | 1.8          |
| 14                                  | Football                             | 281         | 1.5         | 20                                 | Walking, pulling a cart/trolley | 145           | 0.8          |
| 18                                  | Running (8-11 km/h)                  | 185         | 1.0         | 29                                 | Biking to work                  | 68            | 0.4          |
| 25                                  | Cycling (competition)                | 96          | 0.5         | <b>All physical activities</b>     |                                 | <b>18,479</b> | <b>100</b>   |
| 27                                  | Jogging                              | 82          | 0.4         |                                    |                                 |               |              |

n<sup>o</sup> = positional order in prevalence (n= 78 physical activities); % respon. = % responses, percentage that each PA represents over the total of PAs (n= 18,479)
