# Supplementary material for: Domain and intensity of physical activity are associated with metabolic syndrome: A population-based study
Source: PubMed Central journal article supplement (PMC6636743; doi:10.1371/journal.pone.0219798), 2019-07-17
Supplement: pone.0219798.s002.pdf [file pone.0219798.s002.pdf]

Appendix B. Correlations between physical activity domains and intensities, sociodemographic and metabolic syndrome

|                         | Recreat.<br>EE | Domestic<br>EE | Transp.<br>EE | Walking<br>EE | Total<br>EE | Light<br>EE | Moderate<br>EE | Vigorous<br>EE | PA<br>level |
|-------------------------|----------------|----------------|---------------|---------------|-------------|-------------|----------------|----------------|-------------|
| Recreational EE         | ----           | -.16 *         | -.18 *        | .40 *         | .57 *       | .11 *       | .46 *          | .18 *          | .49 *       |
| Domestic EE             |                | ----           | .08 *         | .09 *         | .58 *       | .74 *       | .13 *          | -.12 *         | .04 *       |
| Active transport EE     |                |                | ----          | .40 *         | .09 *       | .11 *       | -.11 *         | .56 *          | -.03 *      |
| Total walking           |                |                |               | ----          | .37 *       | .43 *       | .06 *          | .18 *          | .06 *       |
| Total EE                |                |                |               |               | ----        | .58 *       | .49 *          | .21 *          | .49 *       |
| Light EE                |                |                |               |               |             | ----        | -.10 *         | -.11 *         | -.16 *      |
| Moderate EE             |                |                |               |               |             |             | ----           | -.10 *         | .76 *       |
| Vigorous EE             |                |                |               |               |             |             |                | ----           | .17 *       |
| PA level                |                |                |               |               |             |             |                |                | ----        |
| MetS                    | -.11 *         | .10 *          | -.07 *        | -.00          | -.04 *      | .10 *       | -.04 *         | -.15 *         | -.05 *      |
| Σ MS components         | -.12 *         | .12 *          | -.07 *        | .02           | -.03 *      | .12 *       | -.04 *         | -.19 *         | -.06 *      |
| TV watching (hours/day) | -.02           | .08 *          | -.01          | .03 *         | .03 *       | 0.1 *       | -.01 *         | -.06 *         | .04 *       |
| Age (groups)            | -.15 *         | .22 *          | -.02          | .10 *         | .02         | .21 *       | -.04 *         | -.21 *         | -.09 *      |
| Sex                     | .12 *          | -.40 *         | -.15 *        | -.16 *        | -.15 *      | -.40 *      | .12 *          | .06 *          | .19 *       |
| Educational levels      | .14 *          | -.23 *         | .02           | -.03 *        | -.05 *      | -.19 *      | .07 *          | .15 *          | .11 *       |
| BMI levels              | -.09 *         | .10 *          | -.05 *        | .01           | -.01        | .10 *       | -.06 *         | -.11 *         | -.06 *      |

\*  $p < 0.05$  for correlation coefficients; EE= Energy expenditure in MET-h/day; MetS= Metabolic syndrome (binary)
