# Supplementary material for: Domain and intensity of physical activity are associated with metabolic syndrome: A population-based study
Source: PubMed Central journal article supplement (PMC6636743; doi:10.1371/journal.pone.0219798), 2019-07-17
Supplement: pone.0219798.s003.pdf [file pone.0219798.s003.pdf]

Appendix C. Odds ratio to have metabolic syndrome in each step of logistic regression analysis

|                                          |                                         | Bivariate                    |                  | PA submodel plus TV |          | plus Socio-demographic |          | plus Lifestyle    |                  | plus Family history |                  | plus BMI          |                |                  |
|------------------------------------------|-----------------------------------------|------------------------------|------------------|---------------------|----------|------------------------|----------|-------------------|------------------|---------------------|------------------|-------------------|----------------|------------------|
|                                          |                                         | OR                           | (95% CI)         | OR                  | (95% CI) | OR                     | (95% CI) | OR                | (95% CI)         | OR                  | (95% CI)         | OR                | (95% CI)       |                  |
| Physical activity                        | Physical Activity                       | Domain                       |                  |                     |          |                        |          |                   |                  |                     |                  |                   |                |                  |
|                                          |                                         | Recreational (MET-h/day)     | 0.91             | (0.89; 0.92) ***    | 0.91     | (0.89; 0.93) ***       | 0.93     | (0.91; 0.96) ***  | 0.93             | (0.91; 0.96) ***    | 0.93             | (0.91; 0.96) ***  | 0.95           | (0.93; 0.97) *** |
|                                          |                                         | Domestic (MET-h/day)         | 1.09             | (1.07; 1.11) ***    | 1.07     | (1.05; 1.09) ***       | 1.02     | (0.99; 1.04)      | 1.02             | (0.99; 1.04)        | 1.02             | (0.99; 1.04)      | 1.01           | (0.99; 1.04)     |
|                                          |                                         | Active transport (MET-h/day) | 0.90             | (0.84; 0.95) ***    | 0.85     | (0.80; 0.91) ***       | 0.88     | (0.82; 0.94) ***  | 0.88             | (0.82; 0.93) ***    | 0.88             | (0.82; 0.94) ***  | 0.90           | (0.84; 0.96) **  |
|                                          |                                         | Intensity                    |                  |                     |          |                        |          |                   |                  |                     |                  |                   |                |                  |
|                                          |                                         | Light (MET-h/day)            | 1.08             | (1.06; 1.11) ***    | 1.06     | (1.03; 1.08) ***       | 1.02     | (1.00; 1.05)      | 1.02             | (1.00; 1.05)        | 1.02             | (1.00; 1.05)      | 1.02           | (0.99; 1.05)     |
|                                          |                                         | Moderate (MET-h/day)         | 0.93             | (0.91; 0.95) ***    | 0.94     | (0.92; 0.96) ***       | 0.93     | (0.91; 0.95) ***  | 0.93             | (0.91; 0.96) ***    | 0.93             | (0.91; 0.96) ***  | 0.95           | (0.92; 0.97) *** |
|                                          |                                         | Vigorous (MET-h/day)         | 0.83             | (0.80; 0.87) ***    | 0.85     | (0.81; 0.89) ***       | 0.92     | (0.88; 0.96) ***  | 0.91             | (0.88; 0.95) ***    | 0.92             | (0.88; 0.95) ***  | 0.94           | (0.90; 0.97) *** |
|                                          |                                         | Total PA (MET-h/day)         | 0.97             | (0.96; 0.99) ***    | 0.97     | (0.96; 0.98) ***       | 0.97     | (0.95; 0.98) ***  | 0.96             | (0.94; 0.98) ***    | 0.97             | (0.95; 0.98) ***  | 0.97           | (0.96; 0.99) *   |
|                                          |                                         | Total walking (MET-h/day)    | 0.99             | (0.96; 1.02)        | 0.98     | (0.95; 1.01)           | 0.95     | (0.92; 0.98) **   | 0.95             | (0.92; 0.98) **     | 0.95             | (0.92; 0.98) **   | 0.96           | (0.93; 0.99) *   |
| PA level<br>(≥ 3 MET-h/d vs < 3 MET-h/d) | 0.83                                    | (0.73; 0.94) **              | 0.82             | (0.72; 0.93) **     | 0.74     | (0.64; 0.85) ***       | 0.74     | (0.64; 0.85) ***  | 0.74             | (0.64; 0.85) ***    | 0.77             | (0.66; 0.91) ***  |                |                  |
| Socio-demographic                        | Age                                     | 18-30                        | 1.00             |                     |          |                        | 1.00     |                   | 1.00             |                     | 1.00             |                   | 1.00           |                  |
|                                          |                                         | 31-45                        | 3.26             | (2.6; 4.1) ***      |          |                        | 2.77     | (2.20; 3.50) ***  | 2.75             | (2.18; 3.47) ***    | 2.56             | (2.02; 3.23) ***  | 2.17           | (1.68; 2.79) *** |
|                                          |                                         | 46-60                        | 8.78             | (7.0; 11.0) ***     |          |                        | 6.41     | (5.05; 8.14) ***  | 5.94             | (4.67; 7.55) ***    | 5.59             | (4.39; 7.12) ***  | 3.81           | (2.94; 4.95) *** |
|                                          |                                         | > 60                         | 16.3             | (12.4; 21.4) ***    |          |                        | 10.34    | (7.76; 13.78) *** | 9.08             | (6.78; 12.15) ***   | 8.57             | (6.39; 11.49) *** | 6.63           | (4.82; 9.12) *** |
|                                          |                                         | Gender (men vs. women)       | 1.18             | (1.05; 1.32) **     |          |                        | 1.49     | (1.29; 1.72) ***  | 1.48             | (1.28; 1.72) ***    | 1.52             | (1.31; 1.77) ***  | 1.42           | (1.20; 1.67) *** |
|                                          | Education                               | University                   | 1.00             |                     |          |                        | 1.00     |                   | 1.00             |                     | 1.00             |                   | 1.00           |                  |
|                                          |                                         | Secondary                    | 1.40             | (1.13; 1.75) ***    |          |                        | 1.51     | (1.19; 1.90) ***  | 1.51             | (1.20; 1.92) ***    | 1.50             | (1.18; 1.90) ***  | 1.20           | (0.93; 1.56)     |
|                                          |                                         | Primary or lesser            | 3.59             | (2.94; 4.38) ***    |          |                        | 2.06     | (1.65; 2.56) ***  | 2.06             | (1.65; 2.57) ***    | 2.02             | (1.62; 2.52) ***  | 1.38           | (1.09; 1.76) *** |
| Ancestry (yes vs. no)                    | 1.25                                    | (1.07; 1.45) **              |                  |                     | 1.05     | (0.89; 1.25)           | 1.03     | (0.87; 1.22)      | 1.02             | (0.86; 1.21)        | 1.06             | (0.88; 1.27)      |                |                  |
| Housekeeper (yes vs. no)                 | 2.26                                    | (1.98; 2.59) ***             |                  |                     | 1.72     | (1.45; 2.05) ***       | 1.7      | (1.43; 2.02) ***  | 1.71             | (1.44; 2.04) ***    | 1.59             | (1.31; 1.93) ***  |                |                  |
| Lifestyle                                | TV watching                             | < 1 h/day                    | 1.00             |                     | 1.00     |                        | 1.00     |                   | 1.00             |                     | 1.00             |                   | 1.00           |                  |
|                                          |                                         | 1 - < 2 h/day                | 0.97             | (0.84; 1.12)        | 0.97     | (0.84; 1.11)           | 0.94     | (0.81; 1.09)      | 0.95             | (0.82; 1.11)        | 0.94             | (0.81; 1.10)      | 0.93           | (0.79; 1.10)     |
|                                          |                                         | 2 - < 3 h/day                | 1.22             | (1.05; 1.41) **     | 1.23     | (1.06; 1.43) ***       | 1.09     | (0.93; 1.28)      | 1.10             | (0.94; 1.29)        | 1.09             | (0.92; 1.28)      | 1.09           | (0.91; 1.30)     |
|                                          |                                         | 3 - < 4 h/day                | 1.92             | (1.52; 2.42) ***    | 1.93     | (1.53; 2.44) ***       | 1.51     | (1.17; 1.94) ***  | 1.52             | (1.18; 1.96) ***    | 1.52             | (1.18; 1.96) ***  | 1.35           | (1.03; 1.78) *   |
|                                          |                                         | > 4 h/day                    | 2.87             | (1.99; 4.13) ***    | 2.90     | (2.01; 4.16) ***       | 1.76     | (1.18; 2.63) ***  | 1.80             | (1.20; 2.69) ***    | 1.73             | (1.15; 2.58) **   | 1.64           | (1.06; 2.54) *   |
|                                          | Night-time sleep<br>(< 6 vs. ≥ 6 h/day) | 1.63                         | (1.45; 1.83) *** |                     |          |                        |          | 1.37              | (1.16; 1.61) *** | 1.37                | (1.16; 1.61) *** | 1.24              | (1.03; 1.49) * |                  |
|                                          | Smoker (yes vs. no)                     | 0.67                         | (0.59; 0.77) *** |                     |          |                        |          | 0.76              | (0.66; 0.88) **  | 0.75                | (0.65; 0.87) **  | 0.97              | (0.82; 1.14)   |                  |
|                                          | Alcohol intake (high vs low)            | 1.40                         | (1.12; 1.76) *** |                     |          |                        |          | 1.17              | (0.89; 1.54)     | 1.15                | (0.87; 1.51)     | 1.09              | (0.81; 1.47)   |                  |
| Nap (yes vs. no)                         | 1.45                                    | (1.28; 1.64) ***             |                  |                     |          |                        | 1.15     | (1.00; 1.32) *    | 1.16             | (1.01; 1.33) *      | 1.18             | (1.01; 1.37) *    |                |                  |
| Family history                           | Family history of CVD and diabetes      | Neither                      | 1.00             |                     |          |                        |          |                   |                  | 1.00                |                  | 1.00              |                |                  |
|                                          |                                         | Paternal                     | 1.2              | (1.02; 1.43) *      |          |                        |          |                   |                  |                     | 1.26             | (1.04; 1.51) *    | 1.27           | (1.03; 1.55) *   |
|                                          |                                         | Maternal                     | 1.55             | (1.32; 1.81) ***    |          |                        |          |                   |                  |                     | 1.38             | (1.16; 1.64) ***  | 1.40           | (1.16; 1.69) *** |
|                                          |                                         | Both parents                 | 1.89             | (1.62; 2.21) ***    |          |                        |          |                   |                  |                     | 1.63             | (1.37; 1.92) ***  | 1.58           | (1.31; 1.90) *** |
| Obesity                                  | BMI                                     | Normal                       | 1.00             |                     |          |                        |          |                   |                  |                     |                  | 1.00              |                |                  |
|                                          |                                         | Overweight                   | 8.4              | (6.8; 10.4) ***     |          |                        |          |                   |                  |                     |                  |                   | 5.9            | (4.7; 7.3) ***   |
|                                          |                                         | Obese                        | 30.9             | (24.8; 38.6) ***    |          |                        |          |                   |                  |                     |                  |                   | 21.1           | (16.8; 26.6) *** |
